# Supplementary material for: High phase transition temperature and photoluminescence properties in low-dimensional molecular perovskite ferroelastic crystals
Source: Royal Society of Chemistry journal article supplement (doi:10.1039/d5ce00012b), 2025-01-01
Supplement: d5ce00012b1.pdf [file d5ce00012b1.pdf]

# High phase transition temperature and photoluminescent properties in low-dimensional molecular perovskite ferroelastic crystals

Jia-Mei Zhang,<sup>a</sup> Zhe-Kun Xu,<sup>a</sup> Yan Qin,<sup>a</sup> Peng-Fei Li<sup>\*a</sup> and Zhong-Xia Wang<sup>\*ab</sup>

<sup>a</sup>Ordered Matter Science Research Center, Nanchang University, Nanchang 330031, People's Republic of China

<sup>b</sup>College of Chemistry and Chemical Engineering, Gannan Normal University, Ganzhou 341000, People's Republic of China.

E-mail: lipf@ncu.edu.cn; zhongxiawang@ncu.edu.cn

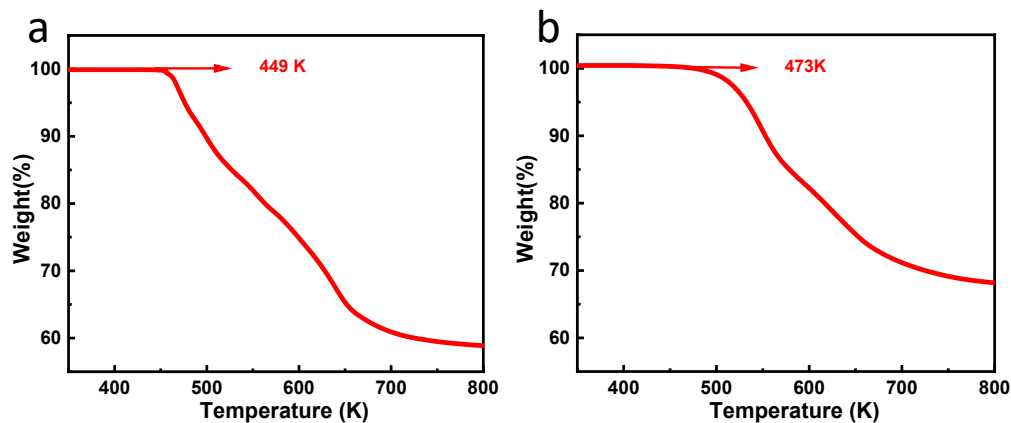

**Figure S1.** TGA curves of [DMPA]CdCl<sub>3</sub>(a) and [DMPA]MnCl<sub>3</sub>(b).

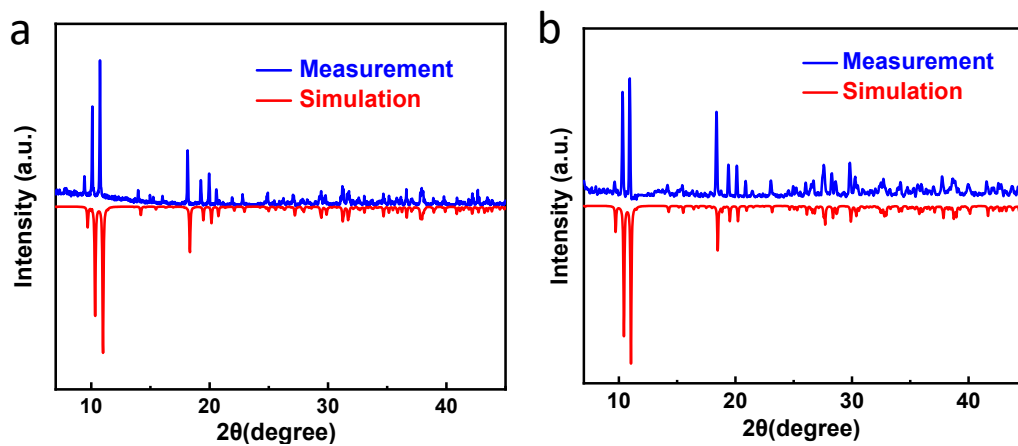

**Figure S2.** The experimental PXRD patterns of [DMPA]CdCl<sub>3</sub>(a) and [DMPA]MnCl<sub>3</sub>(b) at 300 K match well with their simulated ones.

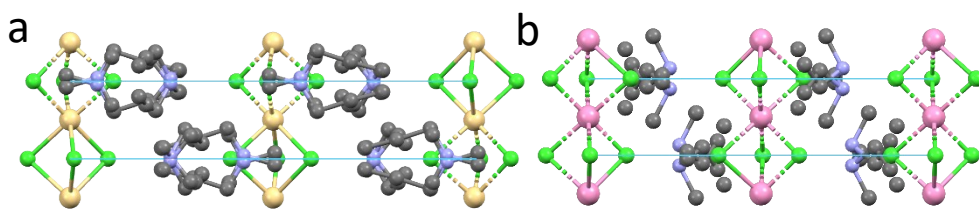

**Figure S3.** Crystal structure of [DMPA]CdCl<sub>3</sub> (a) and [DMPA]MnCl<sub>3</sub> (b) in HTP. The blue solid lines stand for the mirror plane.

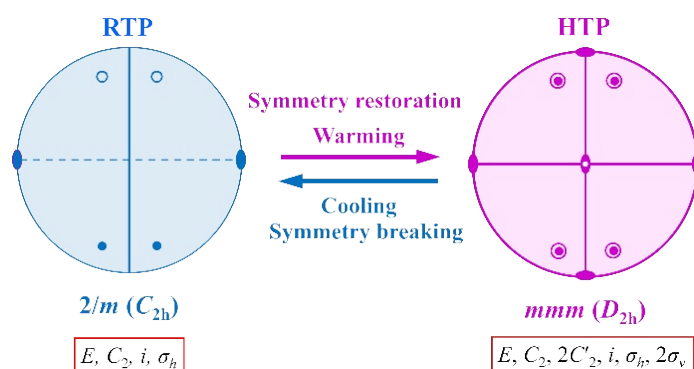

**Figure S4.** Spatial symmetry operations changes of [DMPA]CdCl<sub>3</sub> and [DMPA]MnCl<sub>3</sub>.

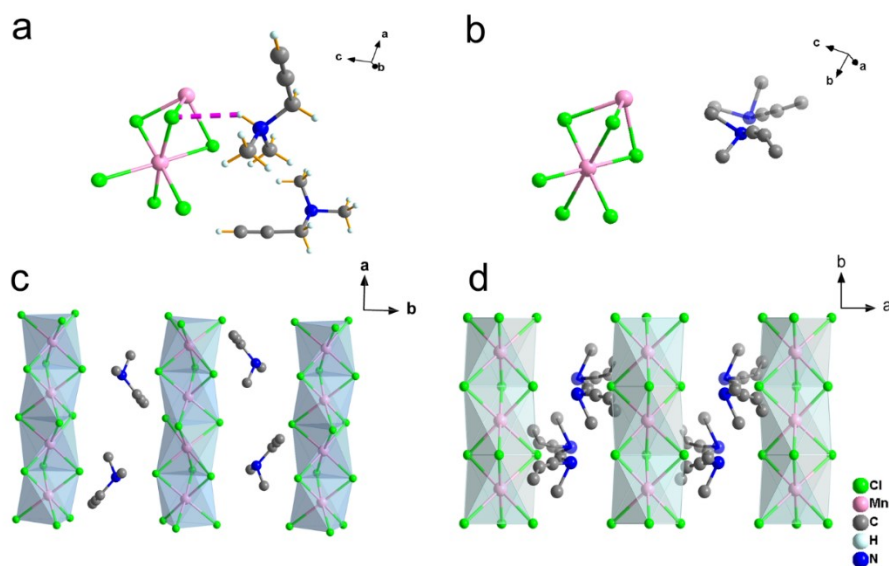

**Figure S5.** Crystal structure of  $[\text{DMPA}]\text{MnCl}_3$  at 300 K (RTP) (a) and 428 K (HTP) (b); Packing views of the structure along the  $a$ -axis of  $[\text{DMPA}]\text{MnCl}_3$  at 300 K (RTP) (c) and along the  $b$ -axis of  $[\text{DMPA}]\text{MnCl}_3$  at 428 K (HTP) (d). The pink dotted line represents the hydrogen bond.

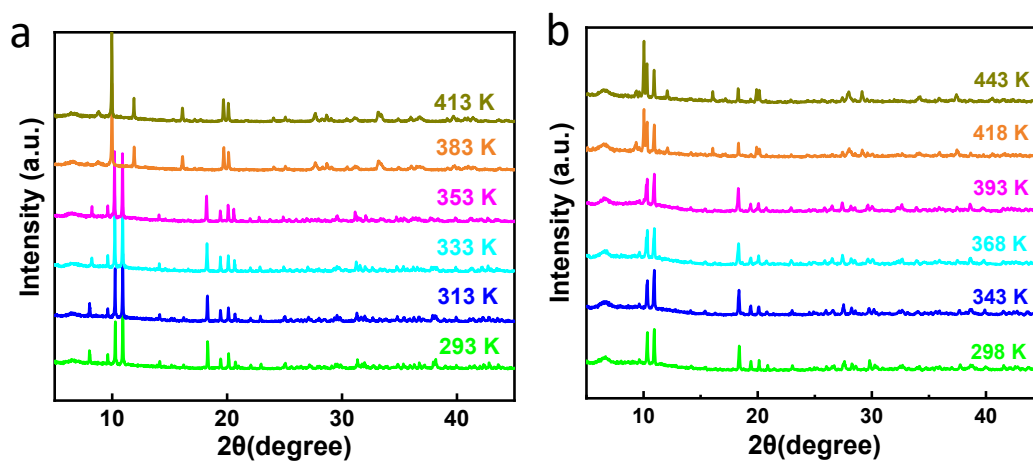

**Figure S6.** The experimental PXRD patterns of  $[\text{DMPA}]\text{CdCl}_3$  (a) and  $[\text{DMPA}]\text{MnCl}_3$  (b) at different temperatures.

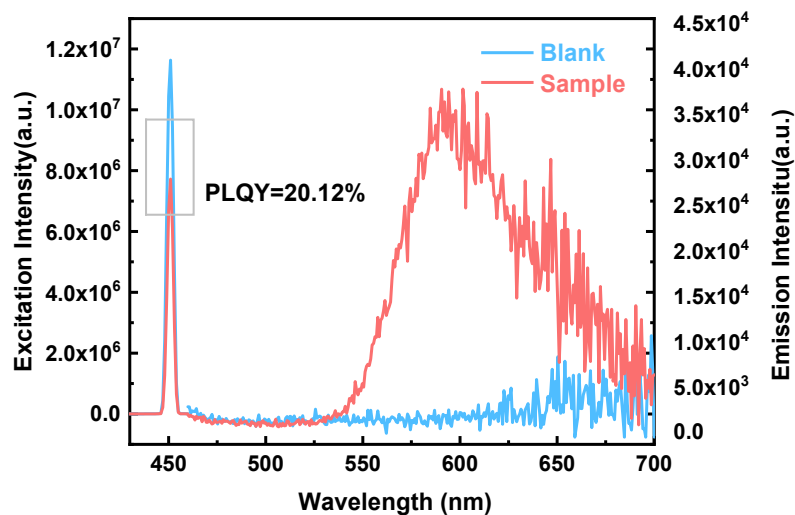

Figure S7. The PL quantum yield of [DMPA]MnCl<sub>3</sub> at room temperature.

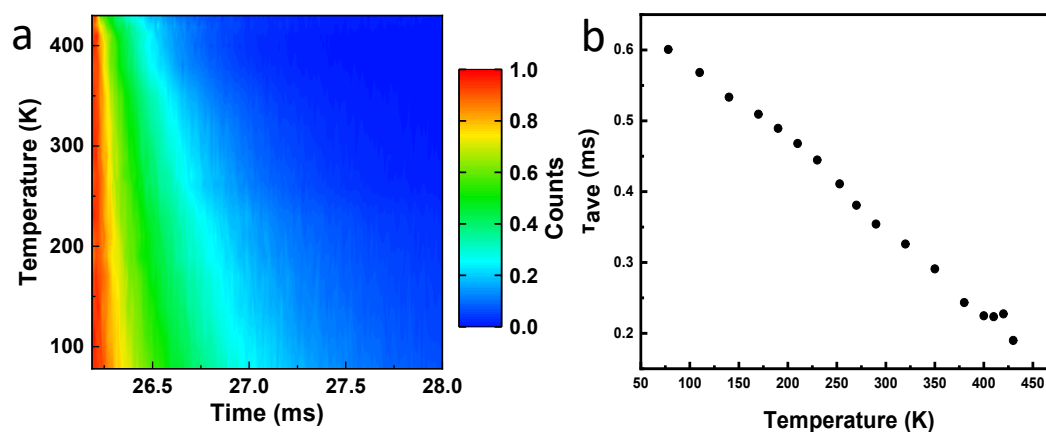

Figure S8. Fluorescence lifetime versus temperature plot for [DMPA]MnCl<sub>3</sub>.

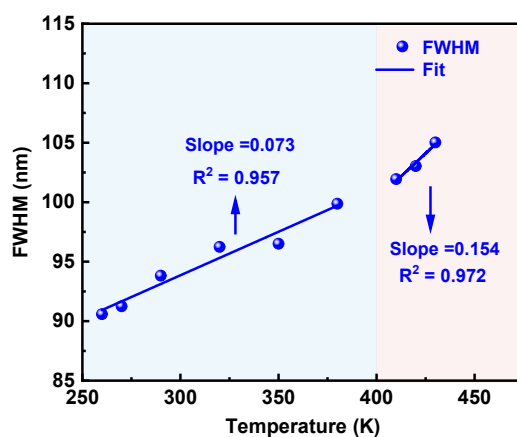

Figure S9. The variation of the full width at half maximum with temperature in VT-PL spectra of [DMPA]MnCl<sub>3</sub>.

**Table S1.** The crystal data for [DMPA]CdCl<sub>3</sub> at different temperatures.

| Compound                   | [DMPA]CdCl <sub>3</sub> |              |
|----------------------------|-------------------------|--------------|
| Temperature (K)            | 300                     | 403          |
| System                     | Monoclinic              | Orthorhombic |
| Space group                | <i>P2<sub>1</sub>/n</i> | <i>Pnma</i>  |
| <i>a</i> (Å)               | 6.6640(9)               | 17.6713(11)  |
| <i>b</i> (Å)               | 17.112(2)               | 6.7314(3)    |
| <i>c</i> (Å)               | 18.366(3)               | 18.1716(10)  |
| $\alpha$ (°)               | 90                      | 90           |
| $\beta$ (°)                | 97.266(11)              | 90           |
| $\gamma$ (°)               | 90                      | 90           |
| <i>V</i> (Å <sup>3</sup> ) | 2077.6(5)               | 2161.6(2)    |
| <i>Z</i>                   | 4                       | 2            |
| <i>R</i> <sub>1</sub>      | 0.0552                  | 0.0836       |
| <i>wR</i> <sub>2</sub>     | 0.0999                  | 0.3203       |
| GOF                        | 1.011                   | 1.066        |

**Table S2.** Hydrogen Bonds for [DMPA]CdCl<sub>3</sub> at 300 K.

| D  | H  | A                | d(D-H)/Å | d(H-A)/Å | d(D-A)/Å | D-H-A/ |
|----|----|------------------|----------|----------|----------|--------|
| N2 | H2 | C12 <sup>1</sup> | 0.98     | 2.41     | 3.236(4) | 141.5  |
| N1 | H1 | C11              | 0.98     | 2.51     | 3.344(4) | 143.4  |

<sup>1</sup>-1/2+X,1/2-Y,-1/2+Z

**Table S3.** Bond length (Å) and bond angle (°) of [DMPA]CdCl<sub>3</sub> at 300 K.

| Atom-Atom            | Length/Å   | Atom-Atom                              | Length/Å   |
|----------------------|------------|----------------------------------------|------------|
| Cd1-Cd2 <sup>1</sup> | 3.3501(6)  | Cd2-Cl2 <sup>2</sup>                   | 2.6618(10) |
| Cd1-Cd2              | 3.3152(6)  | Cd2-Cl5                                | 2.6200(11) |
| Cd1-Cl1              | 2.6501(11) | Cd1-Cl6                                | 2.6555(11) |
| Cd1-Cl4              | 2.6713(11) | Cd2-Cl1 <sup>2</sup>                   | 2.6962(11) |
| Cd1-Cl3              | 2.6396(10) | Cd2-Cl4                                | 2.6465(11) |
| Cd1-Cl5              | 2.6144(11) | Cd2-Cl3 <sup>2</sup>                   | 2.6365(11) |
| Cd1-Cl2              | 2.6781(11) | Cd2-Cl6                                | 2.7136(11) |
| Atom-Atom-Atom       | Angle/°    | Atom-Atom-Atom                         | Angle/°    |
| Cl1-Cd1-Cl4          | 90.04(3)   | Cl4-Cd2-Cl6                            | 84.97(3)   |
| Cl1-Cd1-Cl2          | 84.75(3)   | Cl3 <sup>2</sup> -Cd2-Cl1 <sup>2</sup> | 84.95(3)   |
| Cl4-Cd1-Cl2          | 97.01(3)   | Cl3 <sup>2</sup> -Cd2-Cl2 <sup>2</sup> | 84.03(3)   |
| Cl3-Cd1-Cl1          | 85.82(3)   | Cl3 <sup>2</sup> -Cd2-Cl6              | 97.86(3)   |
| Cl3-Cd1-Cl2          | 83.66(3)   | Cl5-Cd2-Cl4                            | 84.91(3)   |
| Cl3-Cd1-Cl6          | 98.59(3)   | Cl5-Cd2-Cl3 <sup>2</sup>               | 91.24(3)   |
| Cl5-Cd1-Cl1          | 99.81(3)   | Cl5-Cd2-Cl1 <sup>2</sup>               | 98.93(3)   |
| Cl5-Cd1-Cl4          | 84.52(3)   | Cl5-Cd2-Cl6                            | 84.64(3)   |
| Cl5-Cd1-Cl3          | 95.16(3)   | Cl2 <sup>2</sup> -Cd2-Cl1 <sup>2</sup> | 84.17(3)   |
| Cl5-Cd1-Cl6          | 85.92(3)   | Cl2 <sup>2</sup> -Cd2-Cl6              | 92.53(3)   |

<sup>1</sup>-1+X,+Y,+Z; <sup>2</sup>1+X,+Y,+Z

**Table S4.** Bond length (Å) and bond angle (°) of [DMPA]CdCl<sub>3</sub> at 403 K.

| Atom-Atom                | Length/Å   | Atom-Atom                 | Length/Å  |
|--------------------------|------------|---------------------------|-----------|
| Cd1-Cd1 <sup>1</sup>     | 3.3472(14) | Cd1-Cl4                   | 2.670(3)  |
| Cd1-Cd1 <sup>2</sup>     | 3.3842(14) | Cd1-Cl5                   | 2.624(3)  |
| Cd1-Cl1                  | 2.658(3)   | Cd1-Cl2                   | 2.643(3)  |
| Cd1-Cl3                  | 2.649(3)   | Cd1-Cl6                   | 2.606(4)  |
| Atom-Atom-Atom           | Angle/°    | Atom-Atom-Atom            | Angle/°   |
| Cl6-Cd1-Cl1              | 97.08(12)  | Cl6-Cd1-Cl4               | 85.11(11) |
| Cl6-Cd1-Cl3              | 95.14(11)  | Cl2-Cd1-Cl4               | 96.08(12) |
| Cl6-Cd1-Cl5              | 83.97(12)  | Cd1 <sup>2</sup> -Cl1-Cd1 | 79.06(11) |
| Cl3-Cd1-Cl1              | 82.76(11)  | Cd1-Cl3-Cd1 <sup>2</sup>  | 79.39(11) |
| Cl1-Cd1-Cl2              | 84.34(12)  | Cl5-Cd1-Cl2               | 94.65(11) |
| Cl5-Cd1-Cl4              | 82.62(12)  | Cl2-Cd1-Cl3               | 83.69(11) |
| Cl5-Cd1-Cl3              | 98.45(11)  | Cl1-Cd1-Cl4               | 96.17(11) |
| Cd1-Cl4-Cd1 <sup>2</sup> | 77.62(11)  | Cd1-Cl5-Cd1 <sup>2</sup>  | 79.24(12) |
| Cd1-Cl2-Cd1 <sup>2</sup> | 79.62(12)  | Cd1-Cl6-Cd1 <sup>2</sup>  | 79.92(13) |

<sup>1</sup>+X,3/2-Y,+Z; <sup>2</sup>+X,1/2-Y,+Z

**Table S5.** The crystal data for compounds [DMPA]MnCl<sub>3</sub> at different temperatures.

| Compound                   | [DMPA]MnCl <sub>3</sub> |              |
|----------------------------|-------------------------|--------------|
| Temperature (K)            | 300                     | 428          |
| System                     | Monoclinic              | Orthorhombic |
| Space group                | <i>P2<sub>1</sub>/n</i> | <i>Pnma</i>  |
| <i>a</i> (Å)               | 6.3709(3)               | 14.6427(16)  |
| <i>b</i> (Å)               | 16.9377(9)              | 6.4940(8)    |
| <i>c</i> (Å)               | 18.3300(10)             | 10.999(2)    |
| $\alpha$ (°)               | 90                      | 90           |
| $\beta$ (°)                | 97.538(5)               | 90           |
| $\gamma$ (°)               | 90                      | 90           |
| <i>V</i> (Å <sup>3</sup> ) | 1960.87(18)             | 1045.9(3)    |
| <i>Z</i>                   | 4                       | 4            |
| <i>R</i> <sub>1</sub>      | 0.0573                  | 0.2541       |
| <i>wR</i> <sub>2</sub>     | 0.1744                  | 0.4352       |
| GOF                        | 1.095                   | 1.028        |

**Table S6.** Hydrogen Bonds for [DMPA]MnCl<sub>3</sub> at 300 K

| D  | H  | A                | d(D-H)/Å | d(H-A)/Å | d(D-A)/Å | D-H-A/° |
|----|----|------------------|----------|----------|----------|---------|
| N2 | H2 | Cl3 <sup>1</sup> | 0.98     | 2.55     | 3.371(6) | 141.2   |
| N2 | H2 | Cl5 <sup>2</sup> | 0.98     | 2.79     | 3.495(5) | 129.3   |
| N1 | H1 | Cl1              | 0.98     | 2.41     | 3.227(6) | 140.0   |

<sup>1</sup>-1/2+X,3/2-Y,-1/2+Z; <sup>2</sup>-3/2+X,3/2-Y,-1/2+Z



**Table S7.** Bond length (Å) and bond angle (°) of [DMPA]MnCl<sub>3</sub> at 300 K.

| Atom- Atom           | Length/Å   | Atom- Atom                             | Length/Å   |
|----------------------|------------|----------------------------------------|------------|
| Cl2- Mn1             | 2.5317(17) | Mn2- Cl1                               | 2.5631(17) |
| Cl2- Mn2             | 2.5374(17) | Mn2- Cl4 <sup>2</sup>                  | 2.5121(17) |
| Cl3-Mn1              | 2.5720(17) | Cl5-Mn2 <sup>1</sup>                   | 2.5646(17) |
| Cl3-Mn2              | 2.5439(17) | Cl6-Mn1                                | 2.5935(18) |
| Cl6-Mn2 <sup>1</sup> | 2.5565(17) | Mn1-Cl1                                | 2.5594(17) |
| Cl5-Mn1              | 2.5587(17) | Mn1-Cl4                                | 2.5112(17) |
| Atom- Atom- Atom     | Angle/°    | Atom- Atom-Atom                        | Angle/°    |
| Cl2- Mn2-Cl3         | 85.39(6)   | Cl2-Mn1-Cl1                            | 84.17(5)   |
| Cl2- Mn2-Cl6         | 97.38(6)   | Cl3-Mn1-Cl5 <sup>2</sup>               | 90.35(6)   |
| Cl2- Mn2-Cl1         | 84.36(5)   | Cl3-Mn1-Cl1                            | 85.12(5)   |
| Cl5- Mn2-Cl3         | 92.41(6)   | Cl6 <sup>2</sup> -Mn1-Cl1              | 90.03(6)   |
| Cl5- Mn2-Cl6         | 85.05(5)   | Cl1-Mn1-Cl5 <sup>2</sup>               | 96.56(6)   |
| Cl5- Mn2-Cl1         | 99.02(6)   | Cl4 <sup>2</sup> -Mn1-Cl2              | 94.61(6)   |
| Cl1- Mn2-Cl3         | 84.62(6)   | Cl4 <sup>2</sup> -Mn1-Cl3              | 99.12(6)   |
| Cl1- Mn2-Cl6         | 92.01(6)   | Cl4 <sup>2</sup> -Mn1-Cl6 <sup>2</sup> | 85.87(6)   |
| Cl4- Mn2-Cl2         | 91.67(6)   | Cl4 <sup>2</sup> -Mn1-Cl5 <sup>2</sup> | 84.96(6)   |
| Cl4- Mn2-Cl6         | 85.10(6)   | Cl2-Mn1-Cl3                            | 85.86(6)   |
| Cl4- Mn2-Cl5         | 85.10(6)   | Cl2-Mn1-Cl6 <sup>2</sup>               | 98.18(6)   |
| Cl4- Mn2-Cl3         | 98.50(6)   | Cl6 <sup>2</sup> -Mn1-Cl5 <sup>2</sup> | 85.69(6)   |

<sup>1</sup>1+X,+Y,+Z; <sup>2</sup>-1+X,+Y,+Z**Table S8.** Bond length (Å) and bond angle (°) of [DMPA]MnCl<sub>3</sub> at 428 K.

| Atom-Atom                              | Length/Å  | Atom-Atom                              | Length/Å  |
|----------------------------------------|-----------|----------------------------------------|-----------|
| Cl1-Mn1 <sup>1</sup>                   | 2.422(8)  | Mn1-Cl3 <sup>2</sup>                   | 2.567(11) |
| Cl1-Mn1                                | 2.422(8)  | Mn1-Cl4                                | 2.639(6)  |
| Mn1-Cl3                                | 2.567(11) | Mn1-Cl4 <sup>2</sup>                   | 2.639(6)  |
| Atom-Atom-Atom                         | Angle/°   | Atom-Atom-Atom                         | Angle/°   |
| Mn1 <sup>1</sup> -Cl1-Mn1              | 84.2(4)   | Cl3-Mn1-Cl4 <sup>2</sup>               | 86.4(3)   |
| Cl1 <sup>2</sup> -Mn1-Cl4 <sup>2</sup> | 95.1(3)   | Cl3 <sup>2</sup> -Mn1-Cl4 <sup>2</sup> | 93.6(3)   |
| Cl1-Mn1-Cl3 <sup>2</sup>               | 100.9(4)  | Cl3-Mn1-Cl4                            | 93.6(3)   |
| Cl1 <sup>2</sup> -Mn1-Cl3              | 100.9(4)  | Cl3 <sup>2</sup> -Mn1-Cl4              | 86.4(3)   |
| Cl1 <sup>2</sup> -Mn1-Cl3 <sup>2</sup> | 79.1(4)   | Cl1-Mn1-Cl4 <sup>2</sup>               | 84.9(3)   |
| Cl1-Mn1-Cl3                            | 79.1(4)   | Cl1 <sup>2</sup> -Mn1-Cl4              | 85.9(3)   |
| Cl1-Mn1-Cl4                            | 95.1(3)   |                                        |           |

<sup>1</sup>1-X,1/2+Y,1-Z; <sup>2</sup>1-X,-Y,1-Z; <sup>3</sup>1-X,-1/2+Y,1-Z
